# Supplementary material
Source: PubMed Central journal article supplement (PMC3887699)
Supplement: molcell-33-3-285-10-supplementary.pdf [file molcell-33-3-285-10-supplementary.pdf]

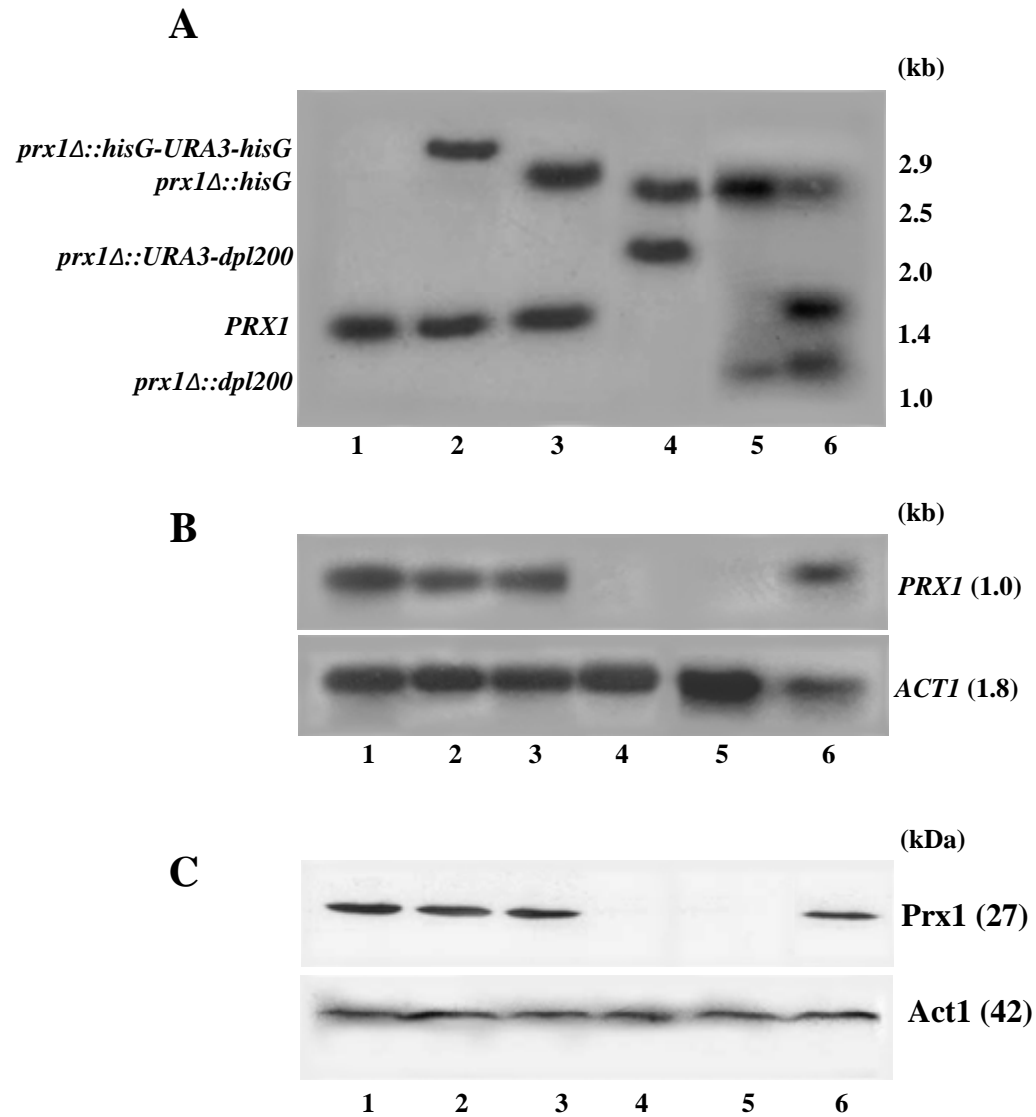

**Supplementary Fig. 1.** Southern (a), Northern (b), and Western (c) blot analyses of the PRX1-related strains constructed in this study. The PRX1-null mutant CPD2 (or *prx1Δ*) was obtained during two consecutive disruptions, first by the URA-Blaster and second by the *URA3-dpl200* cassette. Genomic DNAs were digested with *BsgI* and *NdeI* and the 0.8 kb fragment of TOPO-PRX1<sub>FG</sub> was used as a probe for Southern analysis. The 1.0, 1.4, 2.0, 2.5, and 2.9 kb fragments of (a) correspond to *prx1Δ::dpl200*, *PRX1*, *prx1Δ::URA3-dpl200*, *prx1Δ::hisG*, and *prx1Δ::hisG-URA3-hisG*, respectively. For Northern analysis, total RNAs were probed with a 0.8 kb *NatI/DraIII* digested fragment of TOPO-PRX1<sub>FG</sub>. Lane 1, CAI4 (parental strain); lane 2, CPD1; lane 3, CPD1-U; lane 4, CPD2; lane 5, CPD2-U (or *prx1Δ*); lane 6, *PRX1-R* (or CPD2-R).
